# Supplementary material
Source: PubMed Central journal article supplement (PMC4790822)
Supplement: hawk006797.wt_default.pdf [file hawk006797.wt_default.pdf]

**Web table:** Interrupted time series segmented regression analysis of deaths due to paracetamol poisoning, other drug poisoning and all causes, in England and Wales for individuals aged 10 or more years, 1993-2009

|                                                         | Segmented Regression Models* |        |          |               |        |          |               |        |          |               |        |          |
|---------------------------------------------------------|------------------------------|--------|----------|---------------|--------|----------|---------------|--------|----------|---------------|--------|----------|
|                                                         | Base level                   | Robust | <i>P</i> | Base trend    | Robust | <i>P</i> | Step change   | Robust | <i>P</i> | Trend change  | Robust | <i>P</i> |
|                                                         | coefficient                  | SE     |          | coefficient   | SE     |          | coefficient † | SE     |          | coefficient † | SE     |          |
|                                                         | ( $\beta_0$ )                |        |          | ( $\beta_1$ ) |        |          | ( $\beta_2$ ) |        |          | ( $\beta_3$ ) |        |          |
| <b>With September 1998 as the point of intervention</b> |                              |        |          |               |        |          |               |        |          |               |        |          |
| <b>Suicide, Open</b>                                    |                              |        |          |               |        |          |               |        |          |               |        |          |
| Paracetamol                                             | 30.103                       | 1.901  | <0.001   | 0.188         | 0.116  | 0.111    | -6.023        | 2.430  | 0.016    | -0.463        | 0.132  | 0.001    |
| Paracetamol (adjusted)**                                | 21.085                       | 7.208  | 0.005    | 0.149         | 0.113  | 0.194    | -6.473        | 2.397  | 0.009    | -0.328        | 0.164  | 0.049    |
| Paracetamol (adjusted)***                               | 11.005                       | 10.018 | 0.276    | 0.206         | 0.117  | 0.082    | -6.535        | 2.540  | 0.012    | -0.424        | 0.140  | 0.004    |
| Paracetamol compounds                                   | 4.801                        | 1.081  | <0.001   | 0.007         | 0.087  | 0.933    | 1.249         | 1.534  | 0.419    | 0.013         | 0.095  | 0.892    |
| All drug poisoning<br>except paracetamol                | 291.078                      | 12.757 | <0.001   | 1.290         | 0.886  | 0.150    | 12.928        | 12.150 | 0.291    | -4.347        | 0.925  | <0.001   |
| All drug poisoning                                      | 321.373                      | 14.007 | <0.001   | 1.462         | 0.966  | 0.135    | 7.142         | 13.067 | 0.587    | -4.795        | 1.011  | <0.001   |
| All causes                                              | 1277.176                     | 28.050 | <0.001   | -1.075        | 2.365  | 0.651    | 36.928        | 41.443 | 0.376    | -2.893        | 2.574  | 0.265    |
| <b>Suicide, Open, Accidental</b>                        |                              |        |          |               |        |          |               |        |          |               |        |          |
| Paracetamol                                             | 39.344                       | 2.460  | <0.001   | 0.309         | 0.158  | 0.055    | -10.300       | 3.111  | 0.002    | -0.521        | 0.0176 | 0.004    |
| Paracetamol (adjusted)**                                | 30.171                       | 7.099  | <0.001   | 0.236         | 0.170  | 0.170    | -9.959        | 3.085  | 0.002    | -0.426        | 0.191  | 0.029    |

|                                                       |         |        |        |       |       |       |         |        |       |        |       |       |
|-------------------------------------------------------|---------|--------|--------|-------|-------|-------|---------|--------|-------|--------|-------|-------|
| Paracetamol compounds                                 | 5.777   | 1.172  | <0.001 | 0.017 | 0.087 | 0.842 | 0.358   | 1.489  | 0.811 | 0.081  | 0.094 | 0.392 |
| All drug poisoning<br>except paracetamol              | 445.966 | 27.361 | <0.001 | 2.919 | 1.885 | 0.126 | -10.246 | 29.152 | 0.726 | -3.931 | 2.042 | 0.059 |
| All drug poisoning                                    | 468.263 | 29.352 | <0.001 | 3.122 | 1.989 | 0.121 | -18.461 | 31.001 | 0.554 | -4.361 | 2.140 | 0.046 |
| <b>With January 1998 as the point of intervention</b> |         |        |        |       |       |       |         |        |       |        |       |       |
| <b>Suicide, Open</b>                                  |         |        |        |       |       |       |         |        |       |        |       |       |
| Paracetamol                                           | 29.803  | 2.117  | <0.001 | 0.216 | 0.181 | 0.239 | -3.567  | 2.984  | 0.236 | -0.531 | 0.190 | 0.007 |

\* Regression based on equation (1) in Appendix<sup>28</sup>

\*\* adjusted by addition of covariate (all drug deaths excluding paracetamol) in regression

\*\*\* adjusted by addition of covariate (all cause deaths excluding paracetamol) in regression

† Post intervention change in level ( $\beta_2$ ) and post intervention change in trend ( $\beta_3$ ); SE, standard error
